# Supplementary material
Source: MDPI journal article supplement (https://www.mdpi.com/2073-4441/13/9/1290)
Supplement: s1 [file s1]

## SUPPLEMENTARY INFORMATION

# Silver Doped Zinc Stannate (Ag-ZnSnO<sub>3</sub>) for The Photocatalytic Degradation of Caffeine Under UV Irradiation

Chukwuka BethelAnucha<sup>1,\*</sup>, Ilknur Altin<sup>1,\*</sup>, Emin Bacaksiz<sup>2</sup>, Vassilis N. Stathopoulos<sup>3</sup>, Ismail Polat<sup>4</sup>, Ahmet Yasar<sup>5</sup> and Ömer Faruk Yüksel<sup>6</sup>

<sup>1</sup> Department of Chemistry; Karadeniz Technical University, 61080, Trabzon, Turkey; C.B.Anucha@ktu.edu.tr; ilknurtatlidl@ktu.edu.tr; ismail61@ktu.edu.tr;

<sup>2</sup> Department of Physics; Karadeniz Technical University, 61080, Trabzon, Turkey; eminb@ktu.edu.tr;

<sup>3</sup> Laboratory of Chemistry and Materials Technology; General (Core) Department, National and Kapodistrian University of Athens, Psachna Campus, 34400, Evia, Greece; vasta@uoa.gr

<sup>4</sup> Department of Energy Systems; Karadeniz Technical University, Trabzon 61080, Turkey; ipolat@ktu.edu.tr

<sup>5</sup> Department of Pharmaceutical Chemistry, Karadeniz Technical University, Trabzon 61080, Turkey; ametyasar@ktu.edu.tr

<sup>6</sup> Department of Physics; Selçuk Üniversitesi, Selçuk-Konya 42130, Turkey; fyuksel@selcuk.edu.tr

\* Correspondence: C.B.Anucha@ktu.edu.tr (C.B.A); ilknurtatlidl@ktu.edu.tr (I.A)

**a**

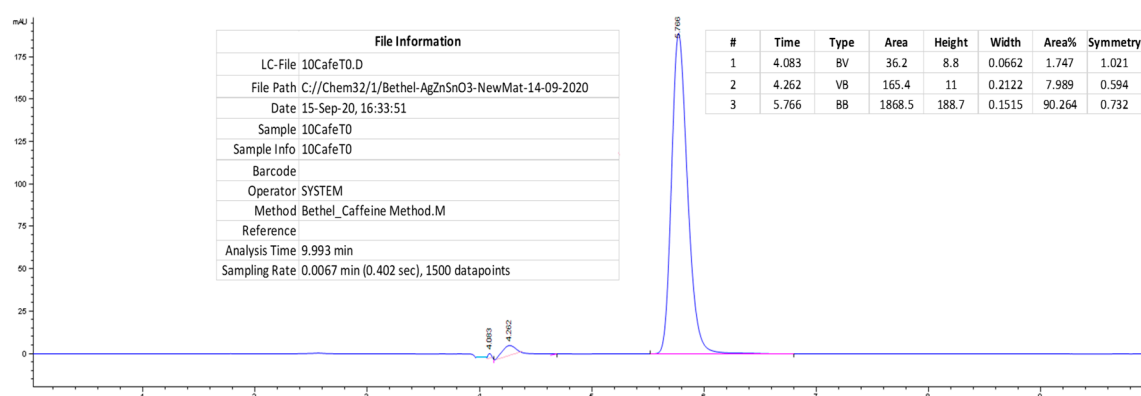

**b**

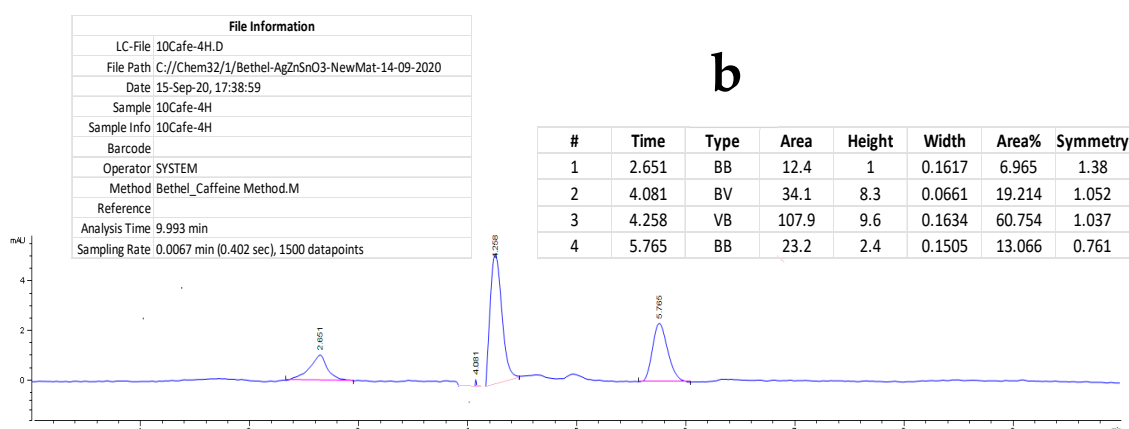

**Figure S1.** A typical chromatogram obtained of initial caffeine concentration at: a) time  $t_0$  before irradiation and b) time  $t_4$  after 4h irradiation in an ~ 6 min. retention time of an ~10 min. run time.

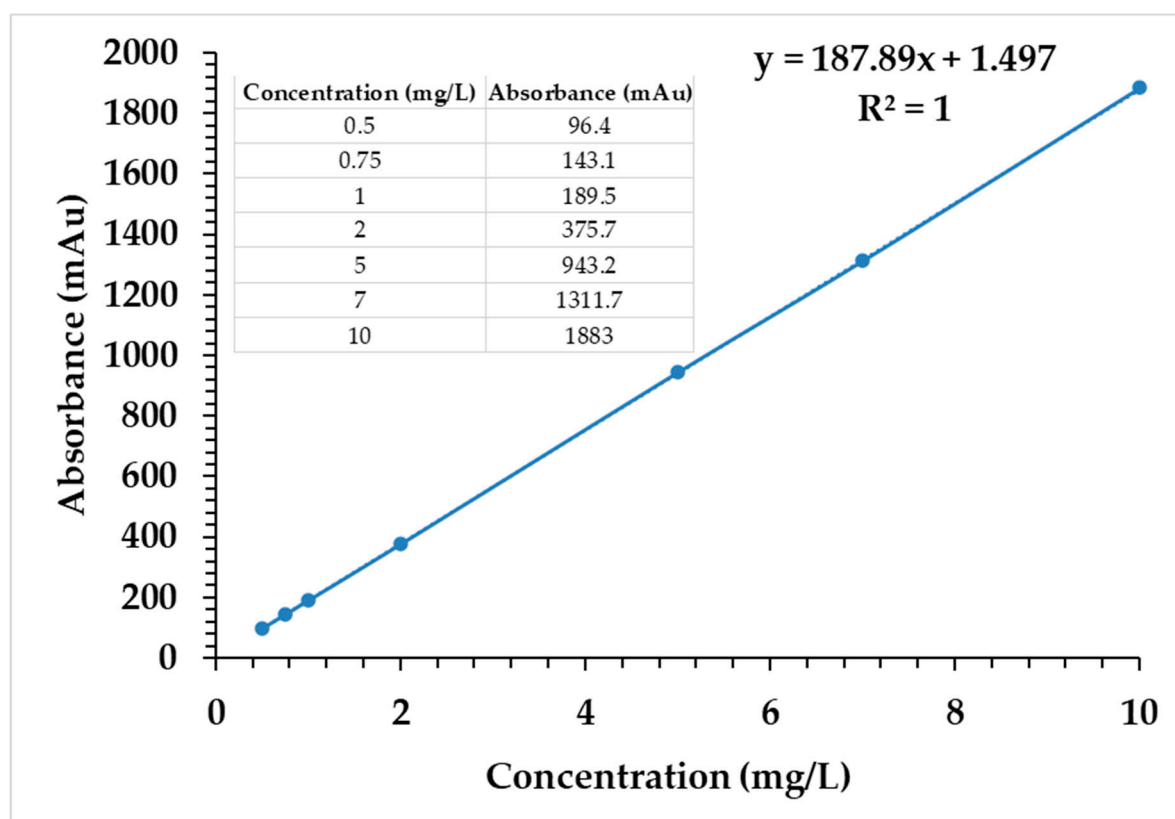

Figure S2. Standard calibration curve of caffeine obtained from standard caffeine solutions (0.5-1 mg/L) (inset).
